# Supplementary material for: ATP citrate lyase mediated cytosolic acetyl-CoA biosynthesis increases mevalonate production in Saccharomyces cerevisiae
Source: PubMed Central journal article supplement (PMC4778282; doi:10.1186/s12934-016-0447-1), 2016-03-03

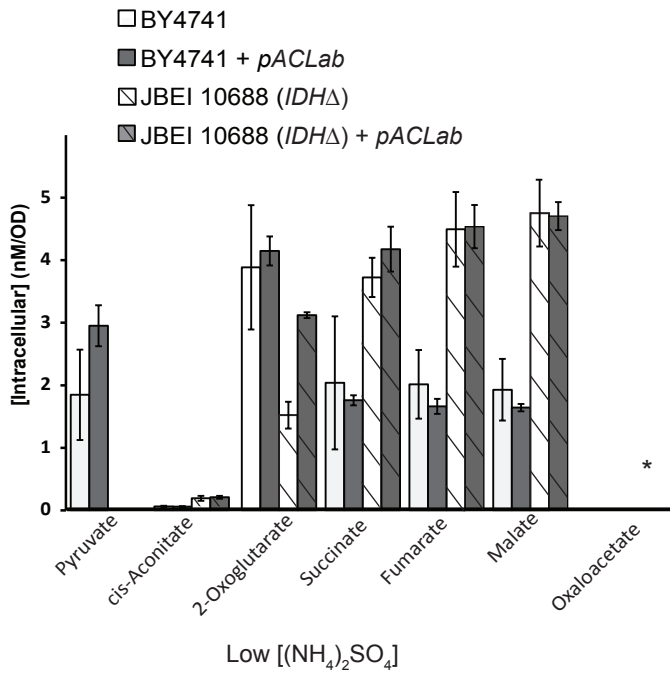

Supplement: 12934_2016_447_MOESM2_ESM.pdf [file 12934_2016_447_MOESM2_ESM.pdf]
