# Supplementary material for: ATP citrate lyase mediated cytosolic acetyl-CoA biosynthesis increases mevalonate production in Saccharomyces cerevisiae
Source: PubMed Central journal article supplement (PMC4778282; doi:10.1186/s12934-016-0447-1), 2016-03-03

Dex -Leu

Acetate -Leu

*S.c. IDH1Δ/2Δ*

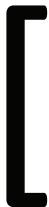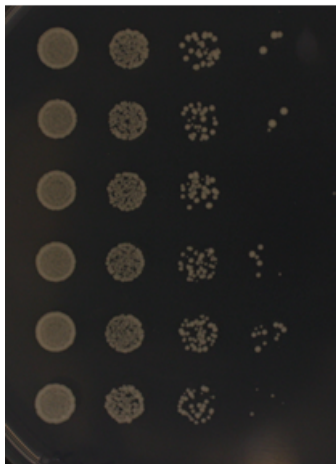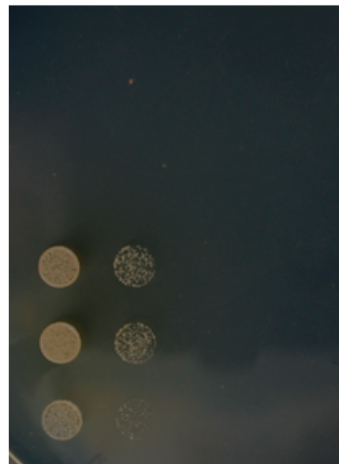

*S.c. IDH1Δ/2Δ*  
+ *Y.l. IDH1/2*

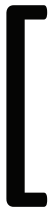

Supplement: 12934_2016_447_MOESM4_ESM.pdf [file 12934_2016_447_MOESM4_ESM.pdf]
